# Supplementary material for: Coronary Artery Calcification as a Marker for Coronary Artery Stenosis: Comparing Kidney Failure to the General Population
Source: PubMed Central journal article supplement (PMC8178454; doi:10.1016/j.xkme.2021.01.010), 2021-04-20
Supplement: mmc1.pdf [file mmc1.pdf]

**Table S1.** Coronary computed tomography angiography results and calcification scores in 127 dialysis patients and 447 patients without chronic kidney disease.

|                                                | <b>Dialysis<br/>(n=127)</b> | <b>Non-CKD<br/>(n=447)</b> | <b>P-<br/>value**</b> |
|------------------------------------------------|-----------------------------|----------------------------|-----------------------|
| <b>Interpretable scans* (%)</b>                | 126 (99%)                   | 437 (98%)                  | 0.99                  |
| <b>With CABG (%)</b>                           | 3 (2%)                      | 47 (11%)                   | 0.01                  |
| <b>With coronary stent (%)</b>                 | 7 (6%)                      | 208 (47%)                  | <0.001                |
| <b>Without any lesions (%)</b>                 | 29 (23%)                    | 50 (11%)                   | <0.01                 |
| <b>CAC score</b>                               | 149 (0 – 748)               | 105 (3 – 324)              | 0.04                  |
| <b>With coronary stenosis (%)</b>              |                             |                            |                       |
| • <b>≥50%</b>                                  | 40 (31%)                    | 157 (35%)                  | 0.45                  |
| • <b>≥70%</b>                                  | 10 (8%)                     | 79 (18%)                   | 0.01                  |
| <b><i>Per patient</i></b>                      |                             |                            |                       |
| <b>Number of coronary segments</b>             | 14.0 ±1.4                   | 14.0 ±1.3                  | 0.78                  |
| <b>Total number of lesions</b>                 | 11.7 ±8.7                   | 10.3 ±8.6                  | 0.10                  |
| • <b>Number of non-calcified lesions</b>       | 0.4 ±1.0                    | 2.5 ±3.7                   | <0.001                |
| • <b>Number of partially calcified lesions</b> | 5.3 ±5.2                    | 5.2 ±5.0                   | 0.97                  |
| • <b>Number of calcified lesions</b>           | 4.6 ±5.6                    | 4.0 ±4.2                   | 0.83                  |

Results are presented as mean ±standard deviation or number (percentage). Abbreviations: Non-

CKD: non-chronic kidney disease at risk for cardiovascular disease; CABG: coronary artery bypass grafting.

\* In one patient CT angiography could not be interpreted reliably (see text).

\*\* Significance tested with Chi-squared tests for proportions and Mann-Whitney-U tests for number of lesions.

**Table S2.** Relationship of coronary artery calcification score with  $\geq 50\%$  coronary artery stenosis on coronary computed tomography angiography, and interaction of dialysis with this relationship in 127 dialysis patients and 447 patients without chronic kidney disease.

|                                                                                                 | Odds ratio (95% CI) | P-value |
|-------------------------------------------------------------------------------------------------|---------------------|---------|
| <b>Odds ratio of <math>\geq 50\%</math> stenosis per 100 unit higher CAC score (unadjusted)</b> |                     |         |
| • ESKD                                                                                          | 1.14 (1.08–1.21)    | <0.001  |
| • Non-CKD                                                                                       | 1.32 (1.22–1.44)    | <0.001  |
| • Interaction term for ESKD compared with non-CKD                                               | 0.86 (0.78–0.95)    | <0.01   |
| <b>Odds ratio of <math>\geq 50\%</math> stenosis per 100 unit higher CAC score (adjusted*)</b>  |                     |         |
| • ESKD                                                                                          | 1.15 (1.07–1.25)    | 0.001   |
| • Non-CKD                                                                                       | 1.29 (1.19–1.42)    | <0.001  |
| • Interaction term for ESKD                                                                     | 0.89 (0.79–1.00)    | 0.05    |

\*Adjusted for age, sex, body mass index, current smoking, presence of diabetes mellitus, C-reactive protein and total cholesterol.

**Table S3.** Relationship of coronary artery calcification score with  $\geq 70\%$  coronary artery stenosis on coronary computed tomography angiography, and interaction of end-stage kidney disease with this relationship in 127 patients with end-stage kidney disease and 447 without chronic kidney disease.

|                                                                                                 | Odds ratio (95% CI)     | P-value          |
|-------------------------------------------------------------------------------------------------|-------------------------|------------------|
| <b>Odds ratio of <math>\geq 70\%</math> stenosis per 100 unit higher CAC score (unadjusted)</b> |                         |                  |
| • ESKD                                                                                          | 1.03 (0.98–1.06)        | 0.15             |
| • Non-CKD                                                                                       | 1.24 (1.13–1.35)        | <0.001           |
| • <b>Interaction term for ESKD compared with non-CKD</b>                                        | <b>0.83 (0.76–0.91)</b> | <b>&lt;0.001</b> |
| <b>Odds ratio of <math>\geq 70\%</math> stenosis per 100 unit higher CAC score (adjusted*)</b>  |                         |                  |
| • ESKD                                                                                          | 1.06 (0.98–1.15)        | 0.13             |
| • Non-CKD                                                                                       | 1.22 (1.11–1.34)        | <0.001           |
| • <b>Interaction term for ESKD</b>                                                              | <b>0.87 (0.77–0.98)</b> | <b>0.02</b>      |

\*Adjusted for age, sex, body mass index, current smoking, presence of diabetes mellitus, C-reactive protein and total cholesterol.

Abbreviations: CAC coronary artery calcification; ESKD end-stage kidney disease; Non-CKD non-chronic kidney disease.
